# Supplementary material for: Hippocampal Theta Modulation of Neocortical Spike Times and Gamma Rhythm: A Biophysical Model Study
Source: PubMed Central journal article supplement (PMC3462809; doi:10.1371/journal.pone.0045688), 2012-10-02
Supplement: pone.0045688.s001.pdf [file pone.0045688.s001.pdf]

## Appendix: Detailed formulas

### Fast-spiking cell membrane dynamics

The dynamics of the fast-spiking inhibitory interneurons were modelled according to previous work by Wang & Buzsáki [1]. The membrane potential for each fast-spiking cell is governed by the equation:

$$C_m \frac{dV}{dt} = -I_{\text{Na}} - I_{\text{K}} - I_{\text{L}} - \sum I_{\text{syn}} - \sum I_{\text{gap}} + I_{\text{ext}} \quad (1)$$

with membrane capacitance  $C_m = 1 \mu\text{F cm}^{-2}$  and  $I_{\text{syn}}$ ,  $I_{\text{gap}}$ , and  $I_{\text{ext}}$  as given by main text equations 2, 4 and 7, respectively. The leak,  $\text{Na}^+$  and  $\text{K}^+$  currents are given by:

$$I_{\text{L}} = g_{\text{L}}(V - E_{\text{rest}}) \quad (2)$$

$$I_{\text{Na}} = g_{\text{Na}} m_{\infty}^3 h (V - E_{\text{Na}}) \quad (3)$$

$$I_{\text{K}} = g_{\text{K}} n^4 (V - E_{\text{K}}) \quad (4)$$

with conductances  $g_{\text{L}} = 0.1 \text{ mS cm}^{-2}$ ,  $g_{\text{Na}} = 35 \text{ mS cm}^{-2}$ , and  $g_{\text{K}} = 9 \text{ mS cm}^{-2}$  and reversal potentials  $E_{\text{Na}} = 55 \text{ mV}$  and  $E_{\text{K}} = -90 \text{ mV}$ . The gating variables  $m_{\infty}$ ,  $h$ , and  $n$  are governed by:

$$m_{\infty} = \frac{\alpha_m}{\alpha_m + \beta_m} \quad (5)$$

$$\frac{dh}{dt} = \phi(\alpha_h(1-h) - \beta_h) \quad (6)$$

$$\frac{dn}{dt} = \phi(\alpha_n(1-n) - \beta_n) \quad (7)$$

with  $\phi = 5$  and the following  $\alpha$  and  $\beta$  functions:

$$\alpha_m(V) = \frac{-0.1(V + 35)}{\exp(-0.1(V + 35)) - 1} \quad (8)$$

$$\beta_m(V) = 4 \exp(-(V + 60)/18) \quad (9)$$

$$\alpha_h(V) = 0.07 \exp\left(-\frac{V + 58}{20}\right) \quad (10)$$

$$\beta_h(V) = \frac{1}{\exp(-0.1(V + 28)) + 1} \quad (11)$$

$$\alpha_n(V) = \frac{-0.01(V + 34)}{\exp(-0.1(V + 34)) - 1} \quad (12)$$

$$\beta_n(V) = 0.125 \exp\left(-\frac{V + 44}{80}\right) \quad (13)$$

## References

1. Wang XJ, Buzsáki G (1996) Gamma oscillation by synaptic inhibition in a hippocampal interneuronal network model. *Journal of Neuroscience* 16: 6402–6413.
